# Supplementary material for: A Neurometabolic Pattern of Elevated Myo-Inositol in Children Who Are HIV-Exposed and Uninfected: A South African Birth Cohort Study
Source: PubMed Central journal article supplement (PMC8995436; doi:10.3389/fimmu.2022.800273), 2022-03-28
Supplement: Table_1.pdf [file Table_1.pdf]

## *Supplementary Material*

**Supplementary Table 1 | Sociodemographic characteristics of the complete-case cohort of children included in the MRS analysis, compared to all children with MRS scans.**

|                                                                                 | Complete-case cohort (N = 83) | Original cohort (N = 156) | p value |
|---------------------------------------------------------------------------------|-------------------------------|---------------------------|---------|
|                                                                                 | Mean ( $\pm$ SD) or n/N (%)   | Mean (SD) or n/N (%)      |         |
| <b>Child age at scan (in months)</b>                                            | 33.99 ( $\pm$ 1.79)           | 33.96 ( $\pm$ 1.77)       | 0.71    |
| <b>Sex</b>                                                                      |                               |                           | 0.91    |
| Male                                                                            | 49/83 (59.04%)                | 91/156 (58.33%)           |         |
| Female                                                                          | 34/83 (40.96%)                | 65/156 (41.67%)           |         |
| <b>Monthly household income (in ZAR)</b>                                        |                               |                           | 0.70    |
| < 1000                                                                          | 29/83 (34.94%)                | 48/156 (30.77 %)          |         |
| 1000 - 5000                                                                     | 49/83 (59.04%)                | 95/156 (60.90 %)          |         |
| > 5000                                                                          | 5/83 (6.02%)                  | 13/156 (8.33 %)           |         |
| <b>Maternal education</b>                                                       |                               |                           | 0.96    |
| Primary                                                                         | 6/83 (7.23%)                  | 9/156 (5.77%)             |         |
| Some secondary                                                                  | 48/83 (57.83%)                | 92/156 (58.97%)           |         |
| Completed secondary                                                             | 25/83 (30.12%)                | 46/156 (29.49%)           |         |
| Tertiary                                                                        | 4/83 (4.82%)                  | 9/156 (5.77%)             |         |
| <b>Maternal employment</b>                                                      | 18/83 (21.68%)                | 42/156 (26.92%)           | 0.37    |
| <b>Maternal relationship status (partnered)</b>                                 | 36/82 (43.90%)                | 74/155 (47.74%)           | 0.57    |
| <b>Maternal age at delivery (in years)</b>                                      | 27.49 ( $\pm$ 5.19)           | 27.94 ( $\pm$ 5.75)       | 0.68    |
| <b>Gestational age at delivery (in weeks)</b>                                   | 38.75 ( $\pm$ 2.61)           | 38.79 ( $\pm$ 2.40)       | 0.99    |
| <b>Premature birth (&lt; 37 weeks' gestation)</b>                               | 11/83 (13.25%)                | 21/156 (13.46%)           | 0.96    |
| <b>Birthweight (in g)</b>                                                       | 3088 ( $\pm$ 572.24)          | 3144 ( $\pm$ 562.67)      | 0.87    |
| <b>Nutritional conditions at 2 years old (based on WHO Z scores guidelines)</b> |                               |                           |         |

|                                                     |                    |                    |      |
|-----------------------------------------------------|--------------------|--------------------|------|
| Stunting (height-for-age Z-score < -2)              | 10/72 (13.88%)     | 28/137 (20.44%)    | 0.24 |
| Underweight (weight-for-age Z-score < -2)           | 3/72 (4.16%)       | 8/137 (5.84%)      | 0.60 |
| Wasting (weight-for-length Z-score < -2)            | 0/72 (0.00%)       | 1/137 (0.73%)      | -    |
| <b>Maternal hospitalization during pregnancy</b>    | 7/83 (8.43%)       | 10/154 (6.49%)     | 0.58 |
| <b>Maternal smoking during pregnancy</b>            | 18/81 (22.22%)     | 29/151 (17.22%)    | 0.59 |
| <b>Maternal alcohol use during pregnancy</b>        | 13/81 (16.05%)     | 23/127 (18.11%)    | 0.70 |
| <b>Maternal depression during pregnancy</b>         | 12/70 (17.14%)     | 31/129 (24.03%)    | 0.26 |
| <b>Exclusive breastfeeding duration (in months)</b> | 2.06 ( $\pm$ 1.84) | 1.83 ( $\pm$ 1.79) | 0.30 |
| <b>Maternal HIV status</b>                          |                    |                    | 0.87 |
| Positive                                            | 36/83 (43.37%)     | 66/156 (42.31%)    |      |
| Negative                                            | 47/83 (56.63%)     | 90/156 (57.69%)    |      |

Data are mean ( $\pm$  SD) or n/N (%). Percentages calculated out of available data. Continuous data was assessed for normality using Shapiro-Wilk tests. Comparisons between CHEU and CHU were made using *t*-tests or Wilcoxon tests for normally and non-normally distributed continuous data, respectively, and  $X^2$  tests with Yates correction for categorical data.

Missing data: maternal relationship status (N = 1 in the complete-case cohort, N = 1 in the original cohort); nutritional conditions at 2 years old (N = 11 in the complete-case cohort, N = 19 in the original cohort); maternal hospitalization during pregnancy (N = 2 in the original cohort); maternal smoking during pregnancy (N = 2 in the complete-case cohort, N = 5 in the original cohort); maternal alcohol use during pregnancy (N = 2 in the complete-case cohort, N = 29 in the original cohort); maternal depression during pregnancy (N = 13 in the complete-case cohort, N = 27 in the original cohort).

**Supplementary Table 2 | Sensitivity analyses for maternal age of delivery, maternal depression during pregnancy, and infant birthweight.**

|                           | Sensitivity analysis for maternal age at delivery* |                           |              | Sensitivity analysis for maternal depression** |                           |              | Sensitivity analysis for infant birthweight*** |                           |              |
|---------------------------|----------------------------------------------------|---------------------------|--------------|------------------------------------------------|---------------------------|--------------|------------------------------------------------|---------------------------|--------------|
|                           | OR                                                 | Confidence interval (95%) | P value      | OR                                             | Confidence interval (95%) | P value      | OR                                             | Confidence interval (95%) | P value      |
| <b>Factor 1 (NAA)</b>     | 0.62                                               | 0.34 – 1.00               | 0.09         | 0.63                                           | 0.35 – 1.08               | 0.10         | 0.76                                           | 0.03 – 2.97               | 0.24         |
| <b>Factor 2 (Ins)</b>     | <b>1.82</b>                                        | <b>1.17 – 3.02</b>        | <b>0.012</b> | <b>1.65</b>                                    | <b>1.04 – 2.82</b>        | <b>0.045</b> | <b>1.56</b>                                    | <b>1.05 – 2.44</b>        | <b>0.036</b> |
| <b>Factor 3 (GPC+PCh)</b> | 0.94                                               | 0.45 – 1.88               | 0.86         | 1.10                                           | 0.54 – 2.31               | 0.79         | 0.79                                           | 0.39 – 1.50               | 0.47         |
| <b>Factor 4 (Glu)</b>     | 1.26                                               | 0.69 – 2.34               | 0.45         | 1.14                                           | 0.59 – 2.27               | 0.69         | 1.46                                           | 0.82 – 2.68               | 0.20         |

Logistic regression analysis of factor scores as predictors for HIV exposure. Odds ratios (OR) greater than 1 indicate an increased likelihood of association between a specific metabolite pattern and HIV exposure. Bold data represents values belonging to statistically significant associations ( $p < 0.05$ ). \*Adjusted for child age, child sex, maternal alcohol use during pregnancy and maternal age at delivery. \*\*Adjusted for child age, child sex, maternal alcohol use during pregnancy and maternal depression during pregnancy. \*\*\*Adjusted for child age, child sex, maternal alcohol use during pregnancy and infant birthweight.

NAA: metabolite pattern dominated by n-acetyl-aspartate ratios; Ins: metabolite pattern dominated by myo-inositol ratios; GPC+PCh: metabolite pattern dominated by total choline (glycerophosphocholine + phosphocholine) ratios; Glu: metabolite pattern dominated by glutamate ratios.

**Supplementary Table 3 | Comparison of region-specific metabolite ratios between CHEU and CHU groups.**

| Metabolite ratios | Parietal grey matter |           |         |           |           |         | Left parietal white matter |              |              |           |           |         | Right parietal white matter |              |              |              |              |              |
|-------------------|----------------------|-----------|---------|-----------|-----------|---------|----------------------------|--------------|--------------|-----------|-----------|---------|-----------------------------|--------------|--------------|--------------|--------------|--------------|
|                   | Unadjusted           |           |         | Adjusted* |           |         | Unadjusted                 |              |              | Adjusted* |           |         | Unadjusted                  |              |              | Adjusted*    |              |              |
|                   | $\beta$              | Robust SE | p-value | $\beta$   | Robust SE | p-value | $\beta$                    | Robust SE    | p-value      | $\beta$   | Robust SE | p-value | $\beta$                     | Robust SE    | p-value      | $\beta$      | Robust SE    | p-value      |
| NAA/Cr+PCr        | -0.140               | 0.037     | 0.21    | -0.174    | 0.040     | 0.15    | -0.117                     | 0.046        | 0.29         | -0.109    | 0.050     | 0.36    | -0.212                      | 0.041        | 0.054        | -0.231       | 0.036        | 0.07         |
| Ins/Cr+PCr        | 0.091                | 0.016     | 0.42    | 0.112     | 0.019     | 0.34    | <b>0.246</b>               | <b>0.018</b> | <b>0.025</b> | 0.223     | 0.020     | 0.066   | <b>0.335</b>                | <b>0.018</b> | <b>0.001</b> | <b>0.329</b> | <b>0.021</b> | <b>0.004</b> |
| GPC+PCh/Cr+PCr    | 0.076                | 0.003     | 0.50    | 0.065     | 0.003     | 0.58    | -0.013                     | 0.006        | 0.90         | -0.060    | 0.005     | 0.58    | -0.107                      | 0.006        | 0.328        | -0.143       | 0.006        | 0.22         |
| Glu/Cr+PCr        | -0.053               | 0.044     | 0.63    | -0.026    | 0.047     | 0.83    | -0.073                     | 0.043        | 0.52         | -0.043    | 0.045     | 0.71    | <b>0.241</b>                | <b>0.048</b> | <b>0.034</b> | <b>0.287</b> | <b>0.051</b> | <b>0.015</b> |

In unadjusted and adjusted analyses, comparisons between CHEU (N = 36) and CHU (N = 47; reference group) were made using linear regression analyses with robust standard errors. \*Adjusted for child age, child sex, and maternal alcohol use during pregnancy. Bold data represents values belonging to statistically significant associations ( $p < 0.05$ ).

$\beta$ : standardized coefficient; SE: standard error; NAA: n-acetyl-aspartate; Ins: myo-inositol; GPC+PCh: total choline (glycerophosphocholine + phosphocholine); Glu: glutamate; /Cr+PCr: relative to creatine + phosphocreatine.
